# Supplementary material for: A near infrared light-triggered human serum albumin drug delivery system with coordination bonding of indocyanine green and cisplatin for targeting photochemistry therapy against oral squamous cell cancer
Source: Royal Society of Chemistry journal article supplement (doi:10.1039/c9bm01192g), 2019-01-01
Supplement: c9bm01192g1.pdf [file c9bm01192g1.pdf]

# Near Infrared Light-Triggered Human Serum Albumin Drug Delivery System with Coordination Bonding of Indocyanine Green and Cisplatin for targeting Photochemistry Therapy against Oral Squamous Cell Cancer

Running Title: Development of a novel drug delivery system with serum albumin-indocyanine green-cisplatin nanoparticles

Yuxin Wang<sup>1,\*</sup>, Diya Xie<sup>1,\*</sup>, Jiongru Pan<sup>1</sup>, Chengwan Xia<sup>1</sup>, Lei Fan<sup>1</sup>, Yumei Pu<sup>1</sup>, Qian Zhang<sup>1</sup>, Yan hong Ni<sup>1</sup>, Jianquan Wang<sup>2,#</sup>, Qingang Hu<sup>1,#</sup>

<sup>1</sup> Department of Oral and Maxillofacial Surgery, Nanjing Stomatological Hospital, Medical School of Nanjing University, Nanjing, China

<sup>2</sup> School of Medical Imaging, Bengbu Medical College, Bengbu, China

\*These authors contributed equally to this work.

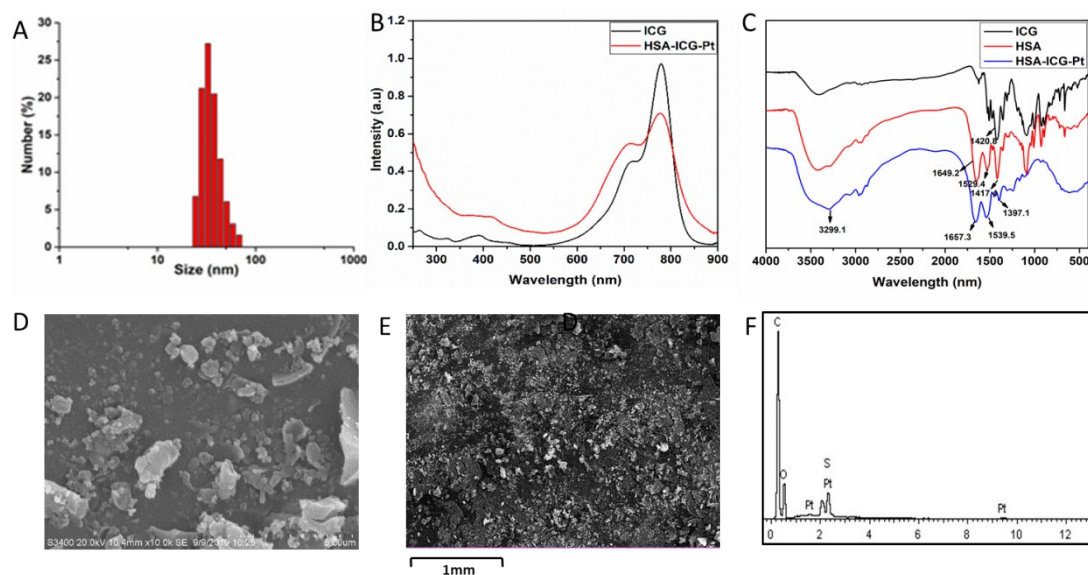

Figure S1: Characterization of HSA-ICG-DDP NPs. A: DLS, B: UV-Vis of ICG and HSA-ICG-DDP NPs, C: FT-IR of ICG, HSA and HSA-ICG-DDP NPs, D-F: SEM and EDX of HSA-ICG-DDP NPs

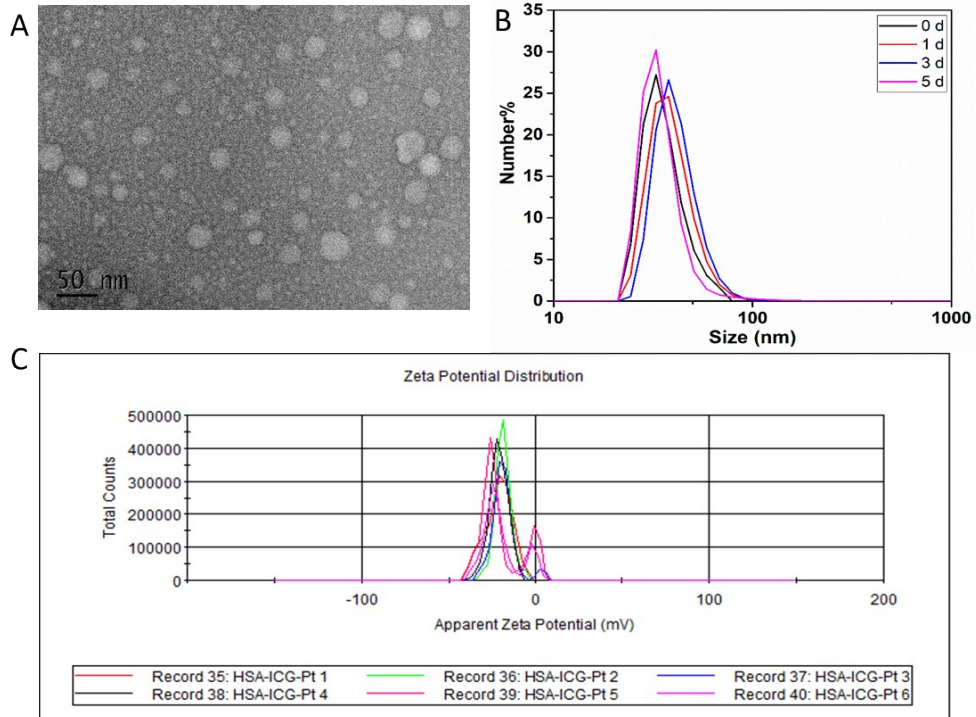

Figure S2: Stability of HSA-ICG-DDP NPs after 5 days A: TEM image, B: Size Stability by DLS, C: Zeta Stability by DLS

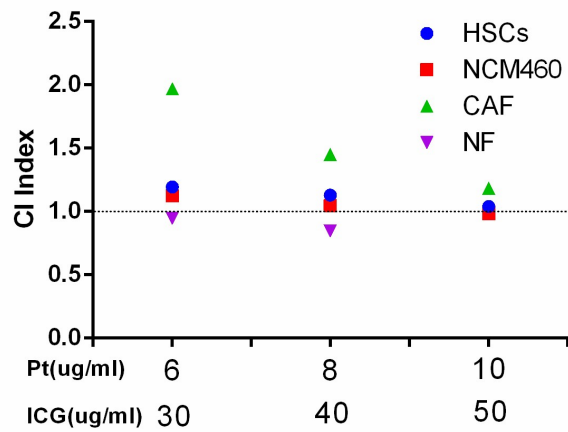

Figure S3: The value of the combination index studies in living cells. The combination index (CI) analysis was used to evaluate the synergistic effect of co-delivery systems. The value of  $CI > 1$ ,  $= 1$ , or  $< 1$  represented antagonism, additive, and synergism for combinational therapy.

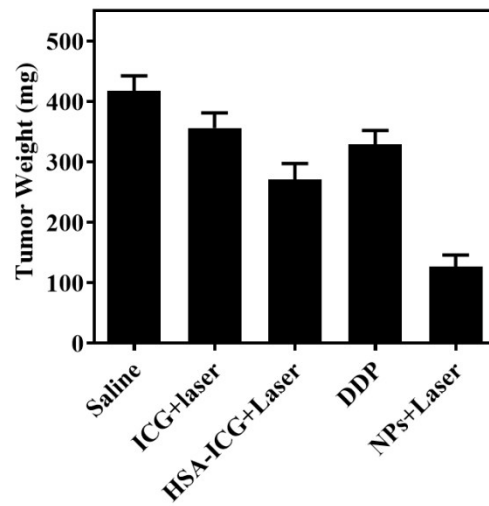

| Group                            | Saline                    | ICG<br>+Laser             | HSA-ICG<br>+Laser         | DDP                       | NPs<br>+Laser             |
|----------------------------------|---------------------------|---------------------------|---------------------------|---------------------------|---------------------------|
| <b>Tumor<br/>Weight<br/>(mg)</b> | <b>417.55<br/>± 61.14</b> | <b>356.32<br/>± 60.96</b> | <b>270.27<br/>± 66.36</b> | <b>328.73<br/>± 57.12</b> | <b>126.73<br/>± 47.24</b> |

Figure S4: The tumor weight after various treatments for 7 days
